# Supplementary material
Source: PubMed Central journal article supplement (PMC2897060)

# Supporting Information

## A Practical Method for the Synthesis of 2-Alkynylpropenals

Charnsak Thongsornkleeb and Rick L. Danheiser\*

*Department of Chemistry  
Massachusetts Institute of Technology  
Cambridge, Massachusetts 02139*

### Contents

Experimental Procedures and Characterization Data for

Compounds **7c-d**, **1b-d**, and **9b-d** S2 – S6

<sup>1</sup>H NMR Spectra for Compounds **1a-d**, **7b-d**, **9a-d** and **10-12** S7 – S20

**2-Methylene-4-*n*-butylbut-3-yn-1-ol (7c).**<sup>1</sup> Reaction of vinyl iodide **5** (0.799 g, 4.34 mmol), 1-hexyne (2.50 mL, 1.78 g, 21.7 mmol), (Ph<sub>3</sub>P)<sub>4</sub>Pd (0.225 g, 0.19 mmol), CuI (0.098 g, 0.52 mmol), and triethylamine (6.00 mL, 4.39 g, 43.4 mmol) in 75 mL of THF at rt for 26 h according to the general procedure afforded 0.984 g of a dark brown oil. This material was purified by column chromatography on 100 g of silica gel (elution with CH<sub>2</sub>Cl<sub>2</sub>) to provide 0.477 g (79%) of enyne **7c** as a yellow oil: IR (film) 3343, 2958, 2873, 2223, and 1618 cm<sup>-1</sup>; <sup>1</sup>H NMR (500 MHz, CDCl<sub>3</sub>) δ 5.43 (d, *J* = 1.5 Hz, 1H), 5.39 (app s, 1H), 4.12 (d, *J* = 5.0 Hz, 2H), 2.33 (t, *J* = 7.0 Hz, 2H), 1.72 (br s, 1H), 1.51-1.56 (m, 2H), 1.39-1.46 (m, 2H), and 0.93 (t, *J* = 7.5 Hz, 3H); <sup>13</sup>C NMR (125 MHz, CDCl<sub>3</sub>) δ 131.8, 119.1, 92.6, 78.4, 65.9, 30.9, 22.2, 19.2, and 13.8; HRMS-EI *m/z*: [M]<sup>+</sup> calcd for C<sub>9</sub>H<sub>14</sub>O, 138.1039; found, 138.1037.

**2-Methylene-4-phenylbut-3-yn-1-ol (7d).** Reaction of vinyl iodide **5** (1.113 g, 6.05 mmol), phenylacetylene (0.86 mL, 0.80 g, 7.86 mmol), (Ph<sub>3</sub>P)<sub>4</sub>Pd (0.203 g, 0.18 mmol), CuI (0.063 g, 0.33 mmol), and triethylamine (1.10 mL, 0.799 g, 7.89 mmol) in 15 mL of THF at rt for 2 h according to the general procedure afforded 1.298 g of a brown oil. This material was purified by column chromatography on 24 g of silica gel (gradient elution with 0-20% EtOAc-hexane) to provide 0.890 g of a yellow oil, which was further purified on 22 g of silica gel (gradient elution with 0-20% EtOAc-hexane) to afford 0.674 g (70%) of enyne **7d** as a pale yellow oil with spectral characteristics consistent with those reported previously.<sup>2</sup> IR (film) 3334, 3060, 2925, 2866, 2208, and 1614 cm<sup>-1</sup>; <sup>1</sup>H

---

<sup>1</sup> Akita, M.; Yasuda, H.; Nakamura, A. *Bull. Chem. Soc. Jpn.* **1984**, *57*, 480.

<sup>2</sup> Mickelson, T. J.; Koviach, J. L.; Forsyth, C. J. *J. Org. Chem.* **1996**, *61*, 9617.

NMR (500 MHz, CDCl<sub>3</sub>)  $\delta$  7.45-7.48 (m, 2H), 7.32-7.35 (m, 3H), 5.61 (dd,  $J = 1.5, 12.0$  Hz, 2H), 4.26 (d,  $J = 6.5$  Hz, 2H), and 1.80 (app t,  $J = 5.5$  Hz, 1H); <sup>13</sup>C NMR (125 MHz, CDCl<sub>3</sub>)  $\delta$  131.9, 131.4, 128.7, 128.5, 122.9, 120.7, 91.1, 87.1, and 65.6; HRMS-EI  $m/z$ : [M]<sup>+</sup> calcd for C<sub>11</sub>H<sub>10</sub>O, 158.0726; found, 158.0731.

**2-Methylene-4-(triisopropylsilyl)but-3-ynal (1b).** Reaction of a solution of the allylic alcohol **7b** (0.040 g, 0.17 mmol) in 3 mL of dichloromethane with Dess-Martin periodinane (0.089 g, 0.19 mmol) and then poly(4-vinylpyridine) (0.092 g, 0.85 mmol) according to the general procedure gave aldehyde **1b** as a yellow oil in 78% yield as determined by <sup>1</sup>H NMR analysis: IR (film) 2944, 2867, 2143, 1718, and 1624 cm<sup>-1</sup>; <sup>1</sup>H NMR (500 MHz, CDCl<sub>3</sub>)  $\delta$  9.49 (s, 1H), 6.59 (d,  $J = 0.6$  Hz, 1H), 6.38 (d,  $J = 0.9$  Hz, 1H), and 1.14 (apparent s, 21H); <sup>13</sup>C NMR (125 MHz, CDCl<sub>3</sub>)  $\delta$  190.0, 138.6, 133.3, 99.7, 98.5, 18.8, and 11.3.

**2-Methylene-4(*n*-butyl)but-3-ynal (1c).** Reaction of a solution of the allylic alcohol **7c** (0.105 g, 0.76 mmol) in 2 mL of dichloromethane with Dess-Martin periodinane (0.358 g, 0.84 mmol) and then poly(4-vinylpyridine) (0.399 g, 3.80 mmol) according to the general procedure gave aldehyde **1c** as a yellow oil in 59% yield as determined by <sup>1</sup>H NMR analysis: IR (film) 2958, 2932, 2234, 1706, and 1635 cm<sup>-1</sup>; <sup>1</sup>H NMR (500 MHz, CDCl<sub>3</sub>)  $\delta$  9.47 (s, 1H), 6.55 (d,  $J = 0.5$  Hz, 1H), 6.30 (app s, 1H), 2.40 (s, 1H), 1.54-1.60 (m, 2H), 1.41-1.48 (m, 2H), and 0.93 (t,  $J = 7.0$  Hz, 3H); <sup>13</sup>C NMR (125 MHz, CDCl<sub>3</sub>)  $\delta$  190.9, 138.5, 133.8, 97.7, 73.6, 30.6, 22.2, 19.3, and 13.8.

**2-Methylene-4(phenyl)but-3-ynal (1d).** Reaction of a solution of the allylic alcohol **7d** (0.093 g, 0.59 mmol) in 3 mL of dichloromethane with Dess-Martin periodinane (0.358 g, 0.84 mmol) and then poly(4-vinylpyridine) (0.312 g, 2.94 mmol)

according to the general procedure gave aldehyde **1d** as a yellow oil in 41% yield as determined by  $^1\text{H}$  NMR analysis: IR (film) 3057, 2925, 2851, 2213, 1701, and 1628  $\text{cm}^{-1}$ ;  $^1\text{H}$  NMR (500 MHz,  $\text{CDCl}_3$ )  $\delta$  9.57 (s, 1H), 7.53-7.55 (m, 2H), 7.35-7.37 (m, 3H), 6.70 (d,  $J = 1.0$  Hz, 1H), and 6.45 (d,  $J = 0.5$  Hz, 1H);  $^{13}\text{C}$  NMR (125 MHz,  $\text{CDCl}_3$ )  $\delta$  190.2, 138.9, 133.3, 132.1, 129.3, 128.6, 122.3, 95.7, and 82.3.

**5-Hydroxy-2,2-dimethyl-6-methylene-8-(triisopropylsilyl)oct-7-yn-3-one (9b).**

A solution of the lithium enolate derivative of pinacolone was generated as described in the General Procedure from the reaction of diisopropylamine (0.024 mL, 0.017 g, 0.17 mmol) and 0.67 mL of *n*-BuLi solution (2.41 M in hexane, 0.16 mmol) in 3 mL of THF followed by addition of pinacolone (0.017 mL, 0.013 g, 0.13 mmol) in 2 mL of THF. A solution of aldehyde **1b** (ca. 0.2 mmol) in 3 mL of THF was prepared as described in the General Procedure by oxidation of allylic alcohol **7b** (0.061 g, 0.26 mmol) with Dess-Martin periodinane (0.120 g, 0.28 mmol) in 5 mL of  $\text{CH}_2\text{Cl}_2$ . Reaction of **1b** with the ketone enolate then afforded 0.070 g of a yellow oil, which was purified by column chromatography on 10 g of silica gel (gradient elution with 0-10% EtOAc-hexane) to provide 0.031 g (70%) of aldol **9b** as a pale yellow oil: IR (film) 3482, 2944, 2866, 2142, 1700, and 1616  $\text{cm}^{-1}$ ;  $^1\text{H}$  NMR (500 MHz,  $\text{CDCl}_3$ )  $\delta$  5.69 (t,  $J = 1.5$  Hz, 1H), 5.55 (t,  $J = 1.5$  Hz, 1H), 4.53-4.56 (m, 1H), 3.52 (d,  $J = 4.0$  Hz, 1H), 3.10 (dd,  $J = 3.0, 18.0$  Hz, 1H), 2.78 (dd,  $J = 8.5, 18.0$  Hz, 1H), 1.15 (s, 9H), and 1.09 (s, 21H);  $^{13}\text{C}$  NMR (125 MHz,  $\text{CDCl}_3$ )  $\delta$  217.3, 132.9, 121.6, 105.0, 93.1, 70.1, 44.6, 42.2, 26.3, 18.8, and 11.4; HRMS-ESI  $m/z$ :  $[\text{M}+\text{Na}]^+$  calcd for  $\text{C}_{20}\text{H}_{36}\text{O}_2\text{Si}$ , 359.2377; found, 359.2376.

**5-Hydroxy-2,2-dimethyl-6-methylene-8-(*n*-butyl)oct-7-yn-3-one (9c).** A

solution of the lithium enolate derivative of pinacolone was generated as described in the

General Procedure from the reaction of diisopropylamine (0.17 mL, 0.12 g, 1.2 mmol) and 0.43 mL of *n*-BuLi solution (2.35 M in hexane, 1.0 mmol) in 10 mL of THF followed by addition of pinacolone (0.105 mL, 0.085 g, 0.84 mmol) in 3 mL of THF. A solution of aldehyde **1c** (ca. 0.9 mmol) in 3 mL of THF was prepared as described in the General Procedure by oxidation of allylic alcohol **7c** (0.218 g, 1.57 mmol) with Dess-Martin periodinane (0.742 g, 1.57 mmol) in 5 mL of CH<sub>2</sub>Cl<sub>2</sub>. Reaction of the aldehyde with the ketone enolate then afforded 0.235 g of a yellow oil, which was purified by column chromatography on 12 g of silica gel (gradient elution with 0-10% EtOAc-hexane) to provide 0.185 g of impure **9c** as a yellow oil. This material was further purified on 18 g of silica gel (gradient elution with 0-10% EtOAc-hexane) to afford 0.140 g (70%) of **9c** as a pale yellow oil: IR (film) 3481, 2961, 2222, 1700, and 1616 cm<sup>-1</sup>; <sup>1</sup>H NMR (500 MHz, CDCl<sub>3</sub>) δ 5.56 (t, *J* = 1.5 Hz, 1H), 5.41 (s, 1H), 4.50-4.53 (m, 1H), 3.41 (d, *J* = 4.0 Hz, 1H), 2.99 (dd, *J* = 3.0, 17.5 Hz, 1H), 2.79 (dd, *J* = 8.5, 18.0 Hz, 1H), 2.34 (t, *J* = 7.0 Hz, 2H), 1.51-1.55 (m, 2H), 1.40-1.47 (m, 2H), 1.16 (s, 9H) and 0.93 (t, *J* = 7.5 Hz, 3H); <sup>13</sup>C NMR (125 MHz, CDCl<sub>3</sub>) δ 197.5, 133.2, 119.9, 92.8, 78.4, 70.5, 44.7, 42.3, 30.9, 26.4, 22.2, 19.2, and 13.8; HRMS-ESI *m/z*: [M+Na]<sup>+</sup> calcd for C<sub>15</sub>H<sub>24</sub>O<sub>2</sub>, 259.1669; found, 259.1674.

**5-Hydroxy-2,2-dimethyl-6-methylene-8-(phenyl)-oct-7-yn-3-one (9d).** A solution of the lithium enolate derivative of pinacolone was generated as described in the General Procedure from the reaction of diisopropylamine (0.054 mL, 0.039 g, 0.39 mmol) and 0.16 mL of *n*-BuLi solution (2.30 M in hexane, 0.36 mmol) in 4 mL of THF followed by addition of pinacolone (0.037 mL, 0.030 g, 0.30 mmol) in 2 mL of THF. A solution of aldehyde **1d** (ca. 0.3 mmol) in 2 mL of THF was prepared as described in the

General Procedure by oxidation of allylic alcohol **7d** (0.130 g, 0.82 mmol) with Dess-Martin periodinane (0.388 g, 0.90 mmol) in 4 mL of CH<sub>2</sub>Cl<sub>2</sub>. Reaction of **1d** with the ketone enolate then afforded 0.097 g of a yellow oil, which was purified by column chromatography on 5 g of silica gel (gradient elution with 0-20% EtOAc-hexane) to provide 0.054 g (71%) of **9d** as a pale yellow oil: IR (film) 3462, 3057, 2970, 2201, and 1701 cm<sup>-1</sup>; <sup>1</sup>H NMR (500 MHz, CDCl<sub>3</sub>) δ 7.43-7.46 (m, 2H), 7.32-7.35 (m, 3H), 5.75 (t, *J* = 1.5 Hz, 1H), 5.61 (t, *J* = 1.5 Hz, 1H), 4.64-4.65 (m, 1H), 3.57 (d, *J* = 4.5 Hz, 1H), 3.06 (dd, *J* = 3.0, 18.0, 1H), 2.89 (dd, *J* = 8.5, 17.5 Hz, 1H), and 1.18 (s, 9H); <sup>13</sup>C NMR (125 MHz, CDCl<sub>3</sub>) δ 217.2, 132.8, 131.8, 128.7, 128.6, 123.0, 121.5, 91.5, 87.2, 70.3, 44.7, 42.2, and 26.4; HRMS-ESI *m/z*: [M+Na]<sup>+</sup> calcd for C<sub>17</sub>H<sub>20</sub>O<sub>2</sub>, 279.1356; found, 279.1362.

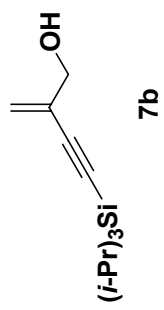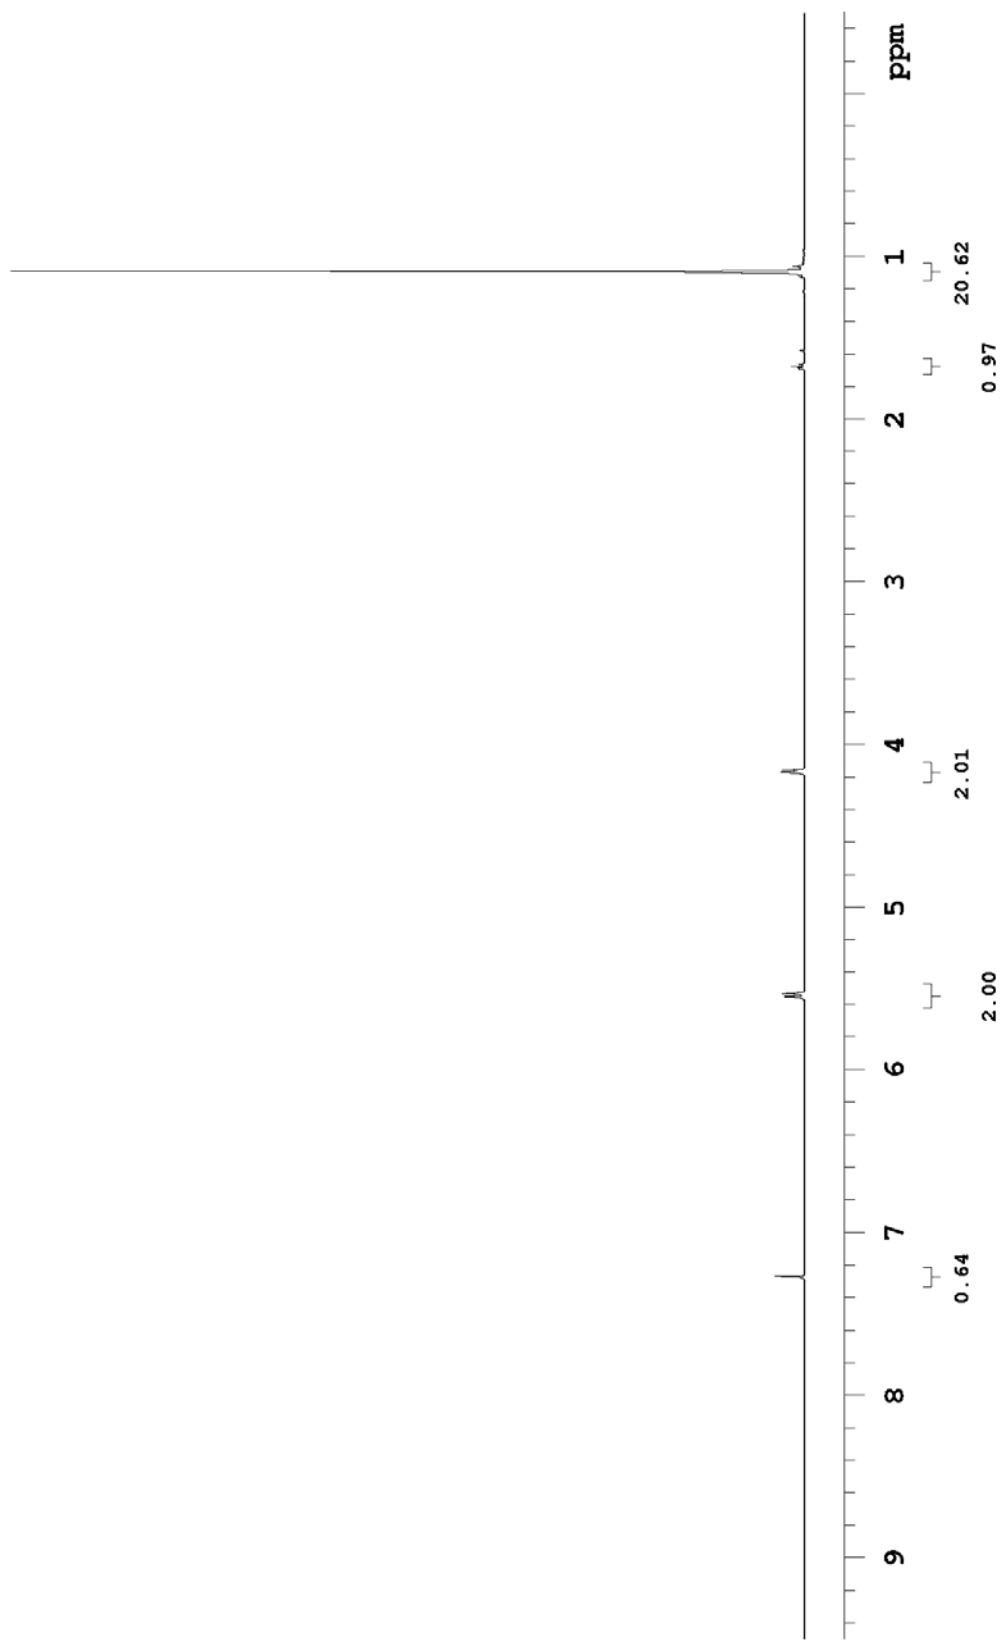

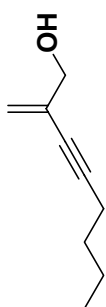

7c

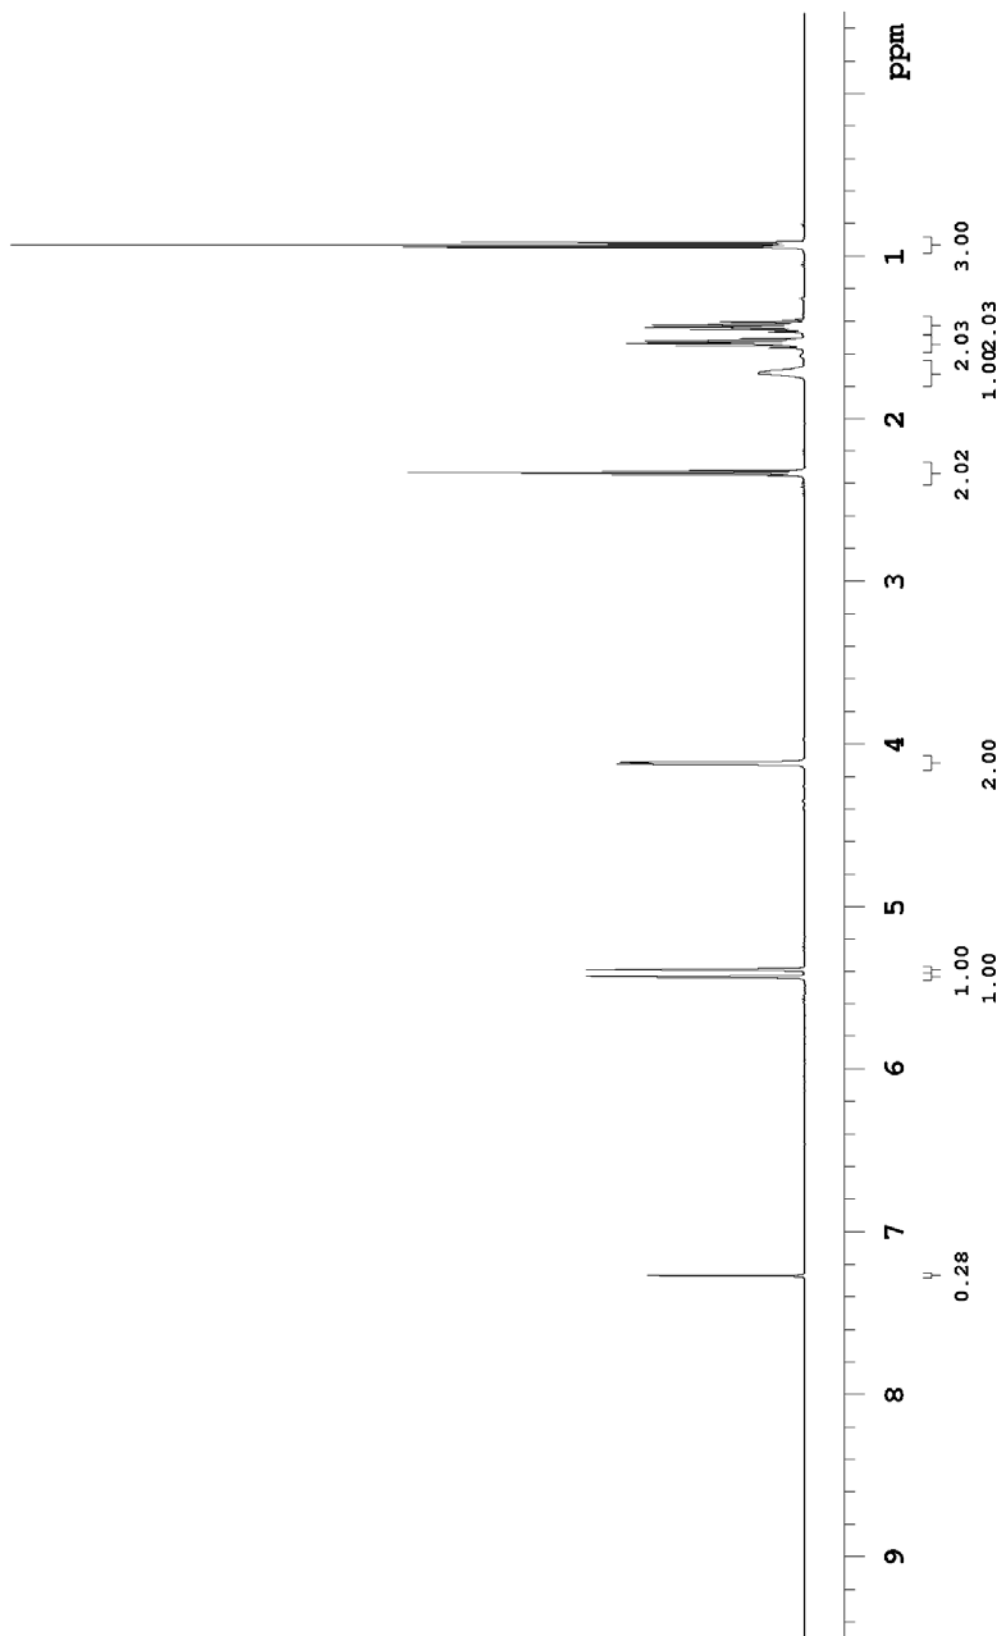



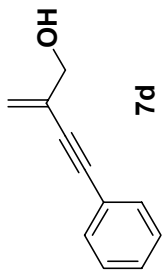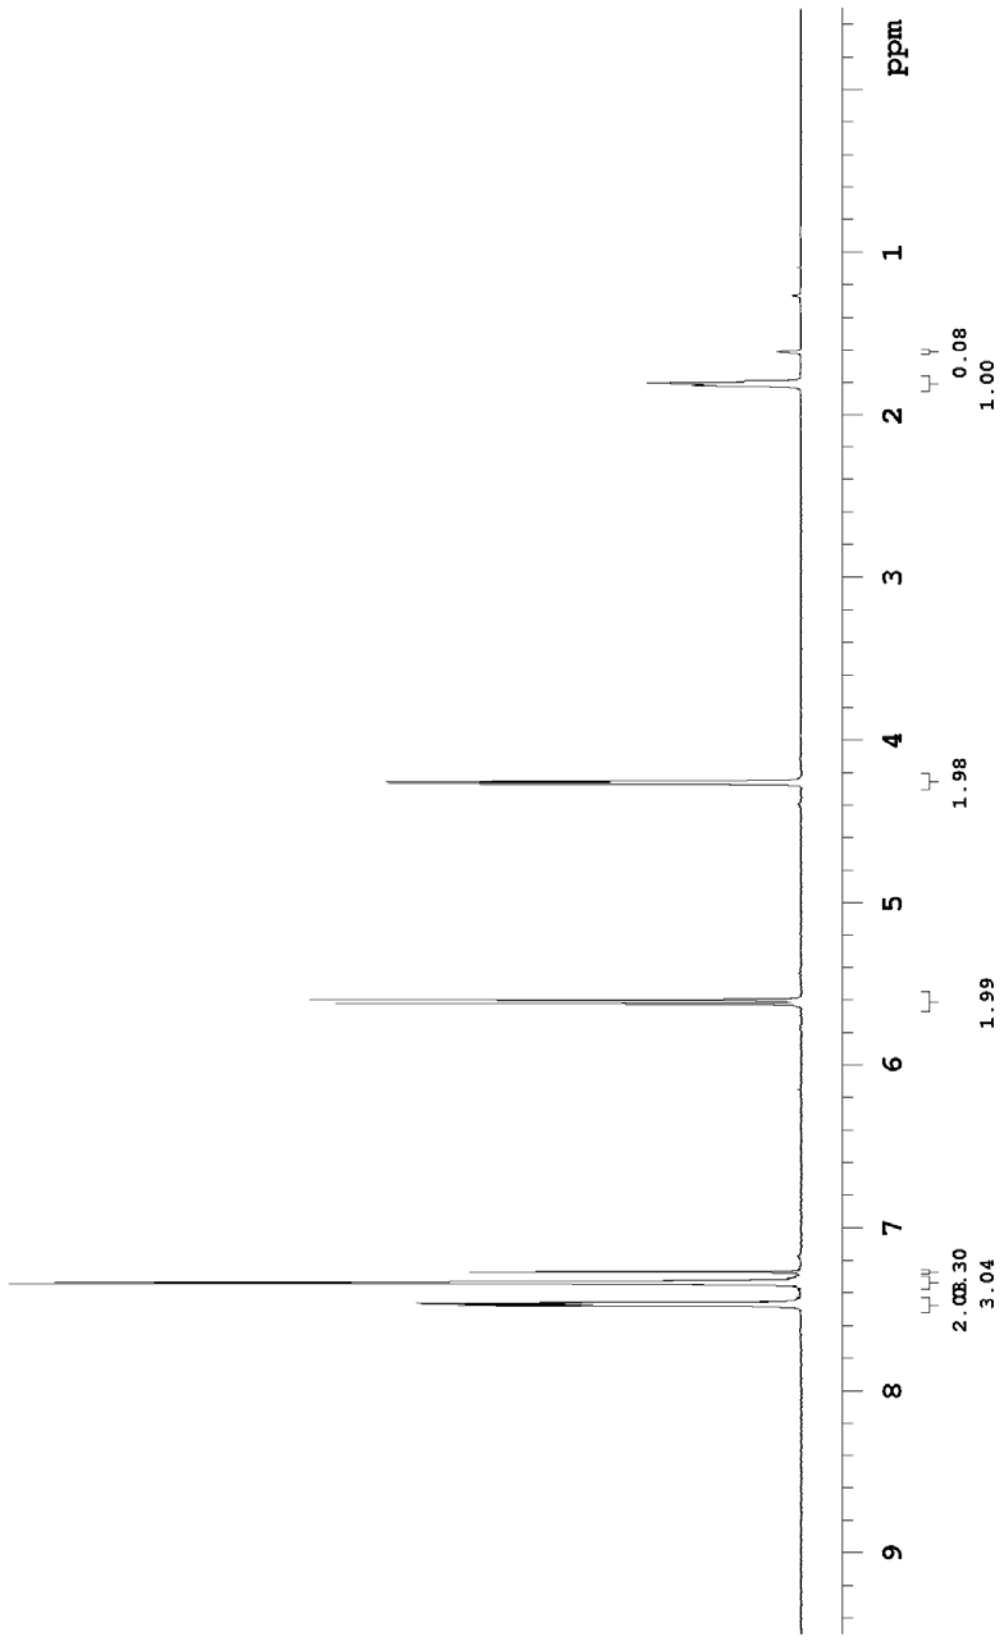

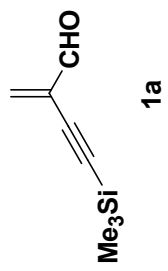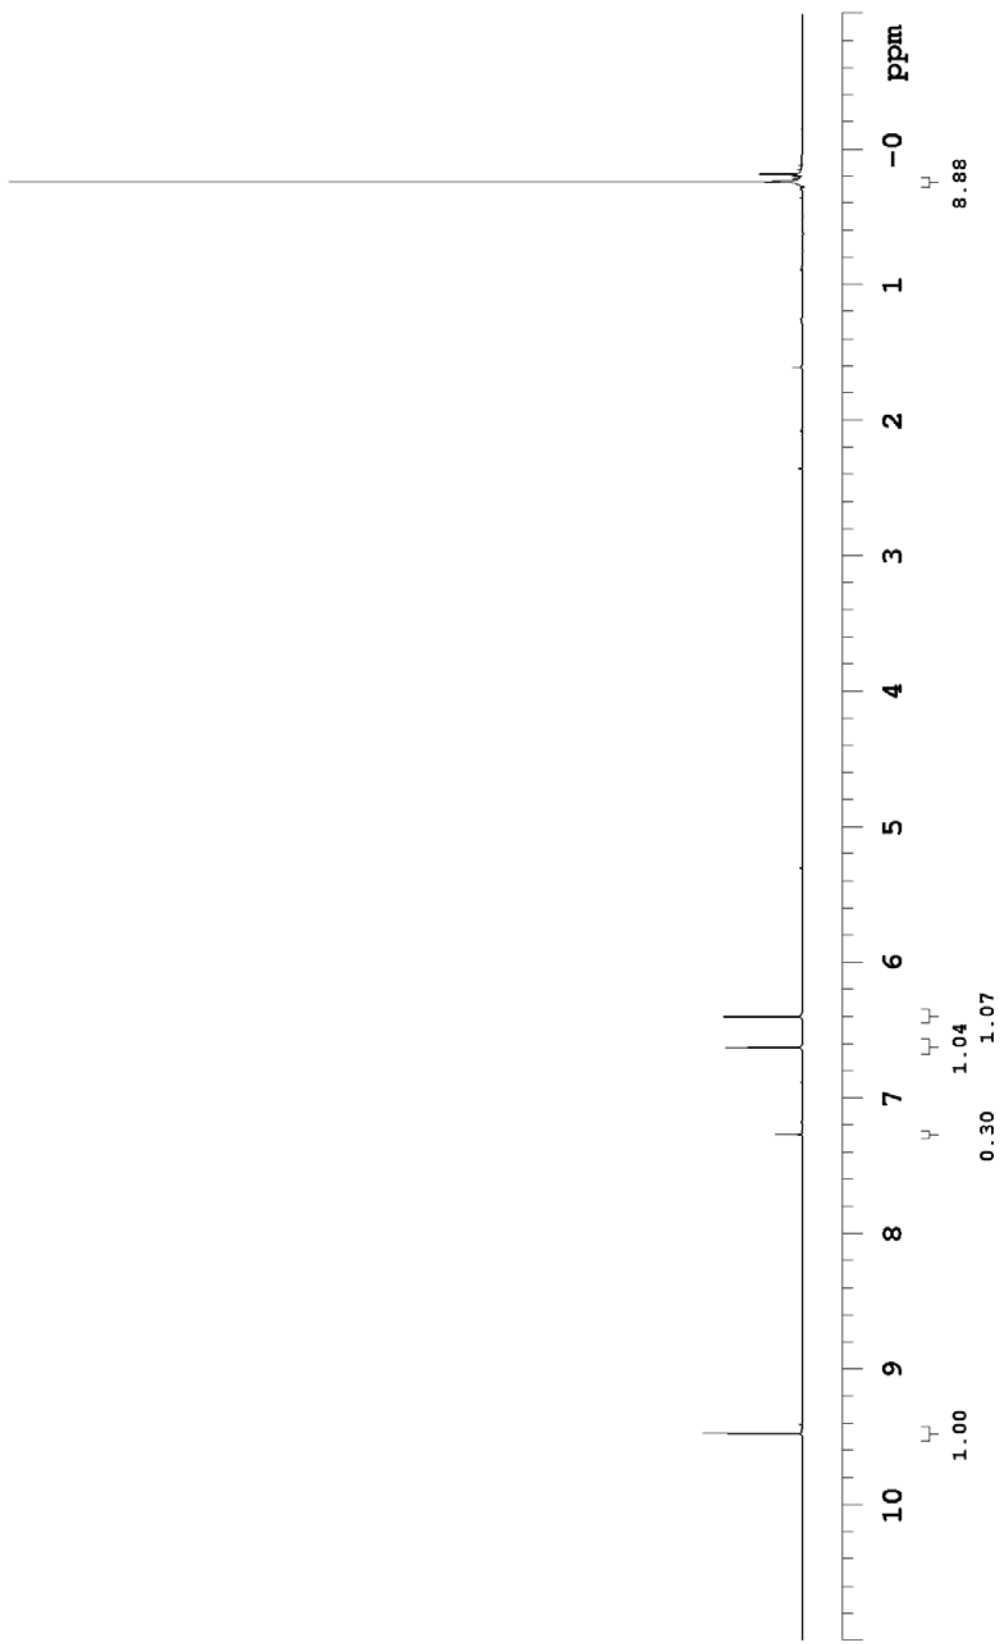

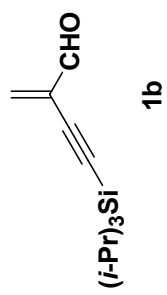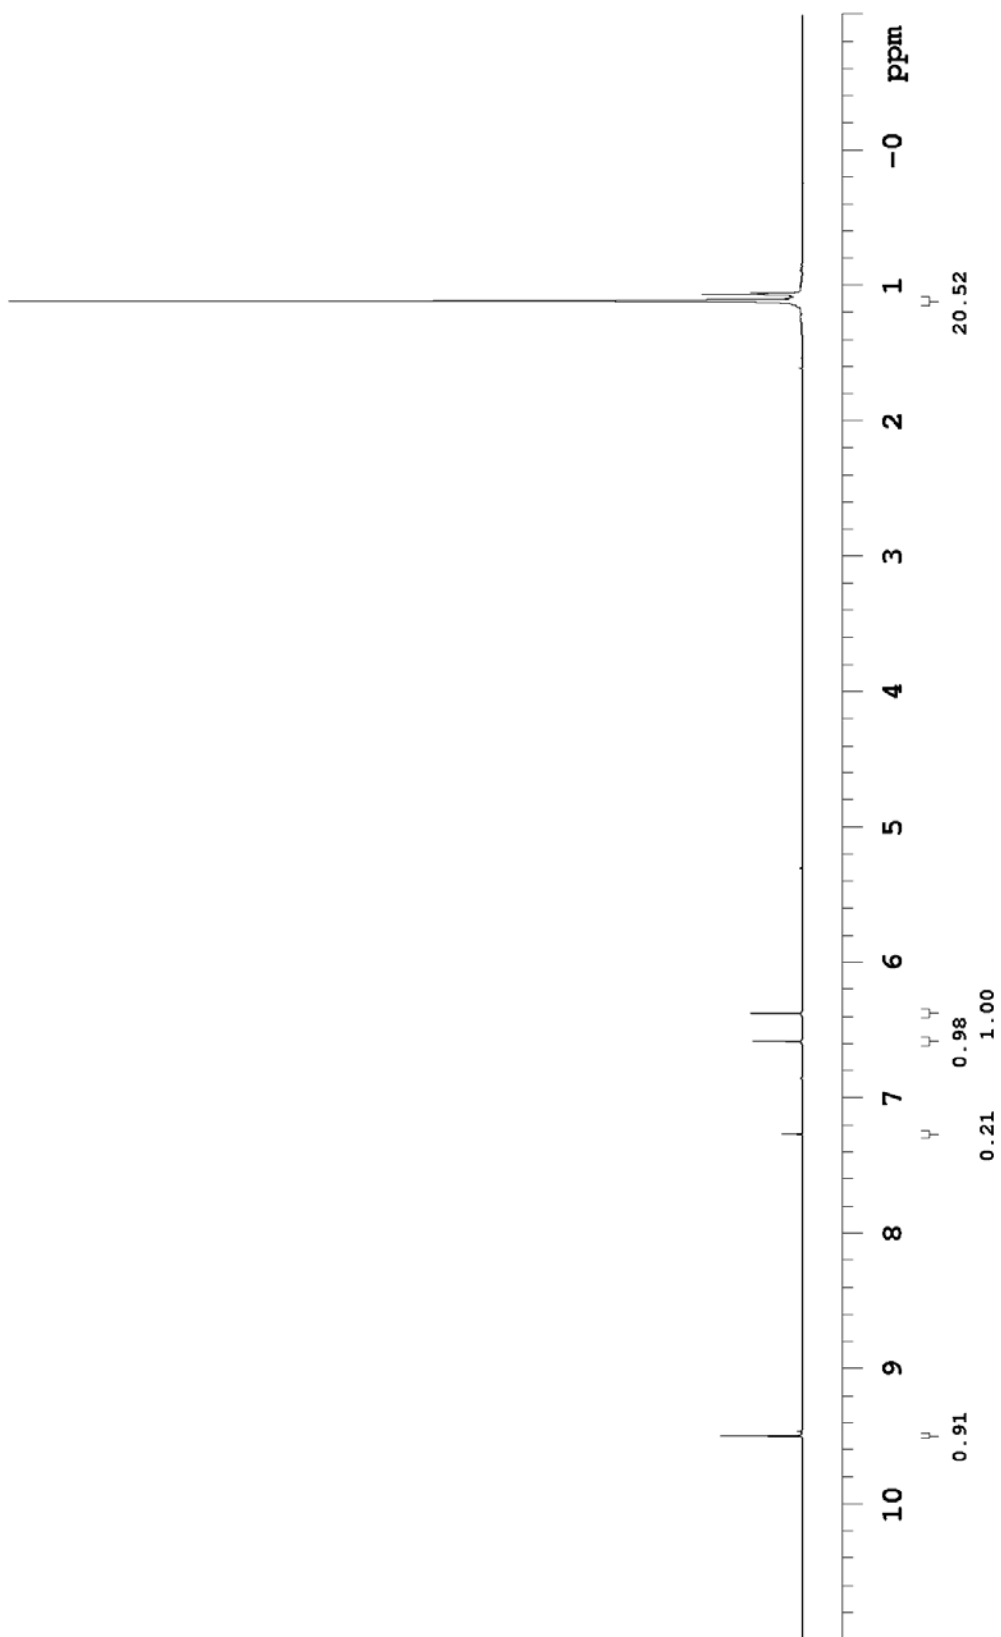

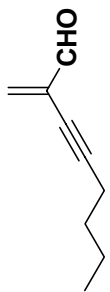

1c

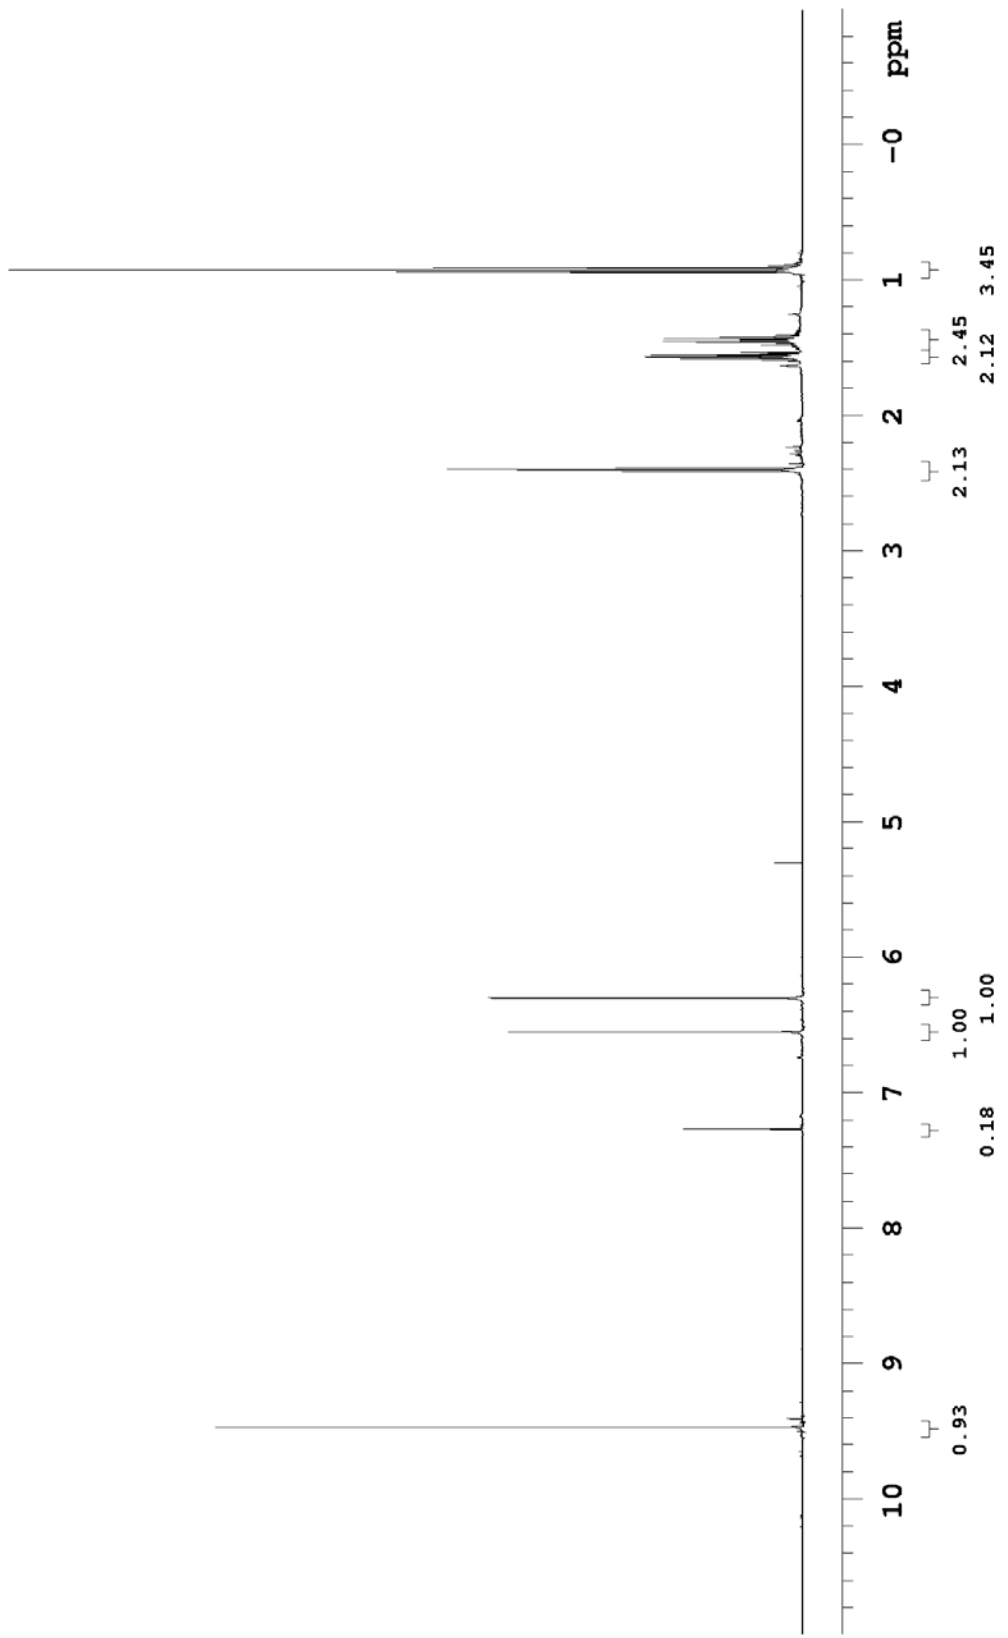

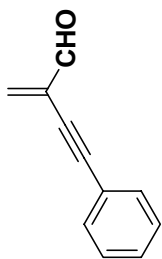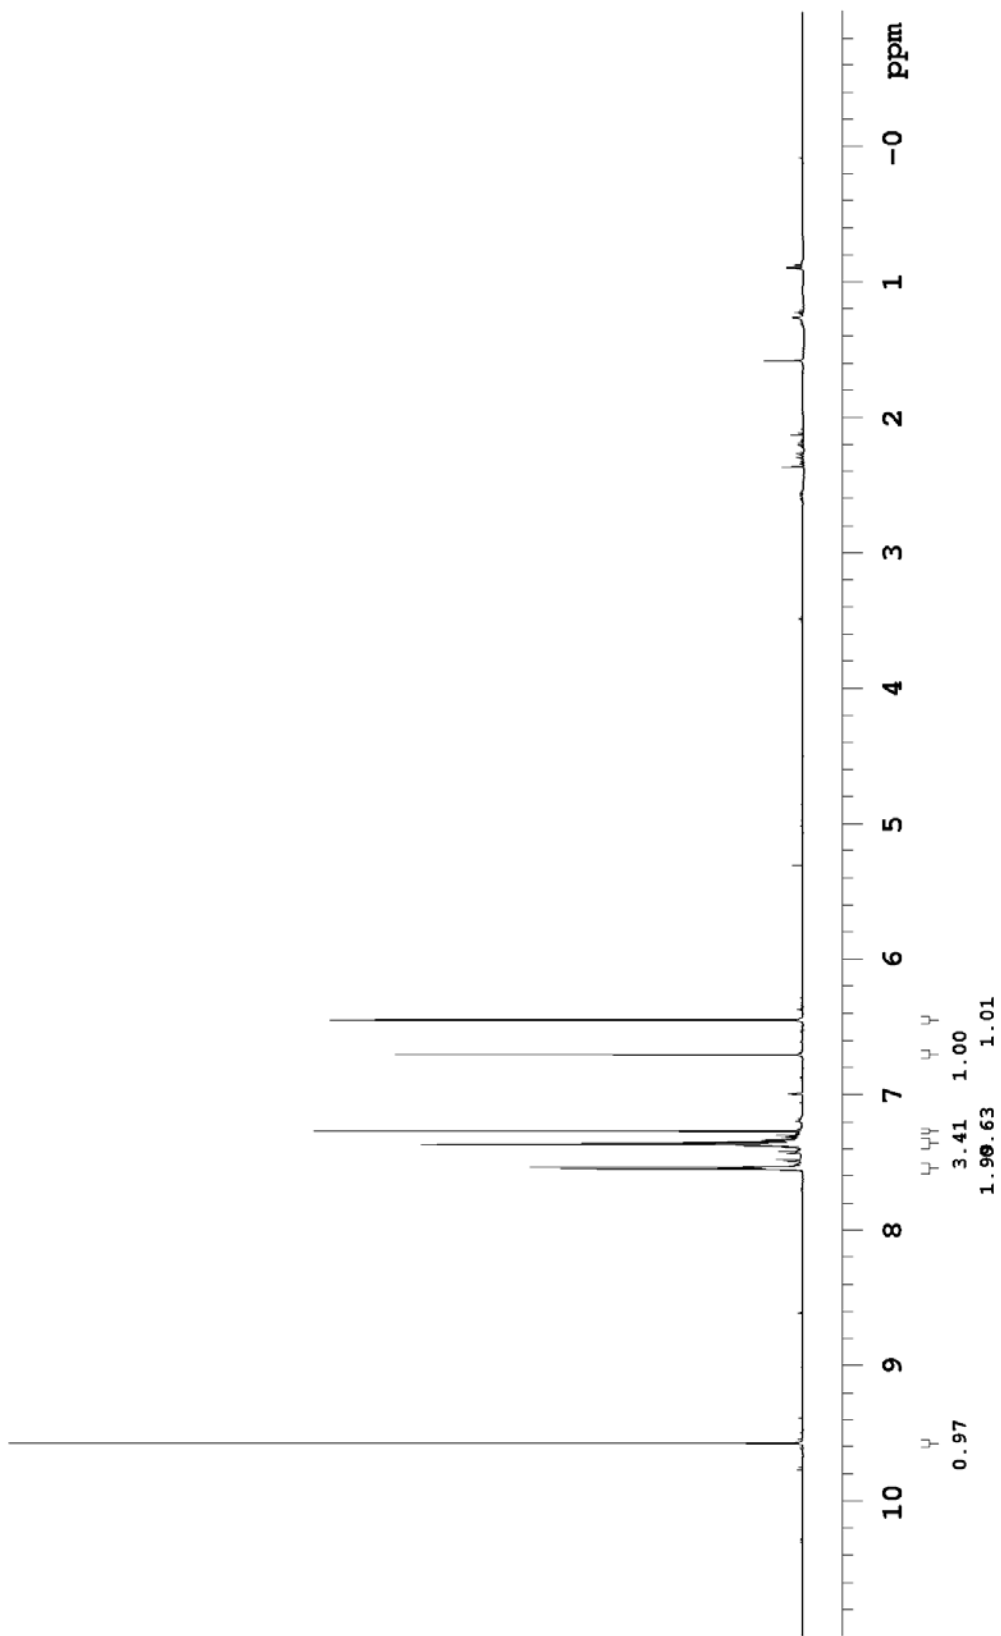

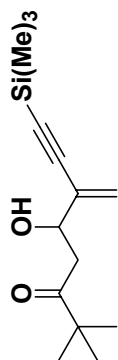

9a

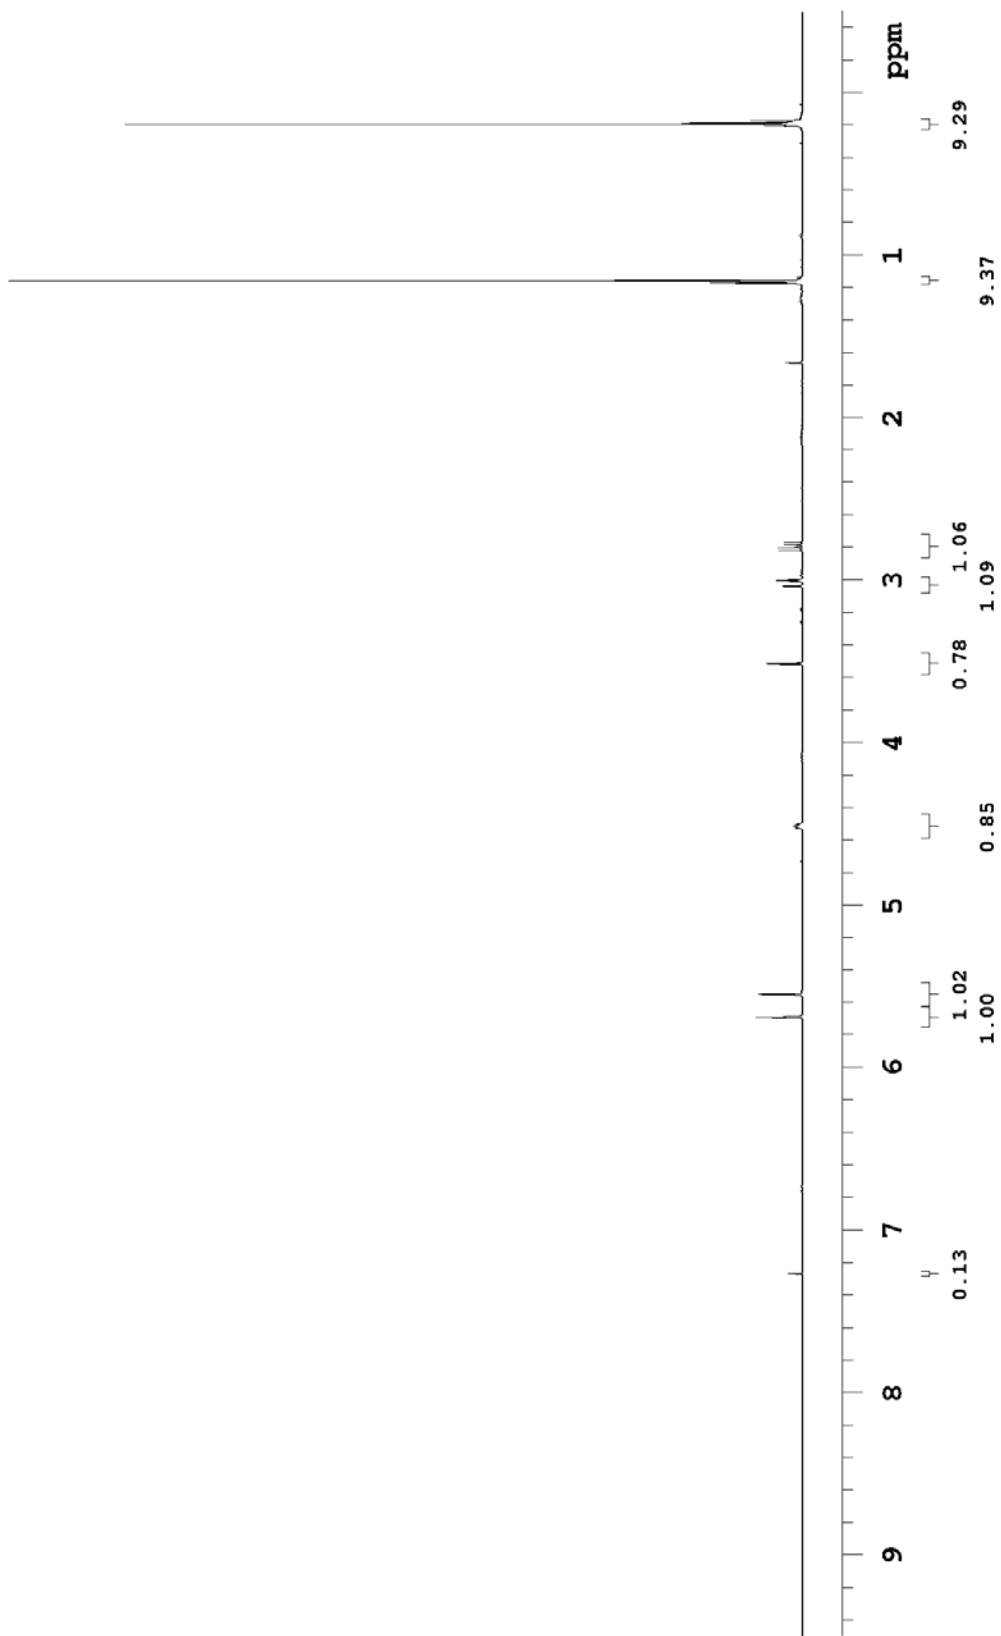

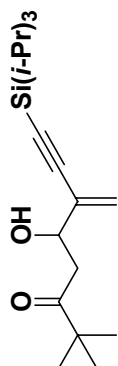

9b

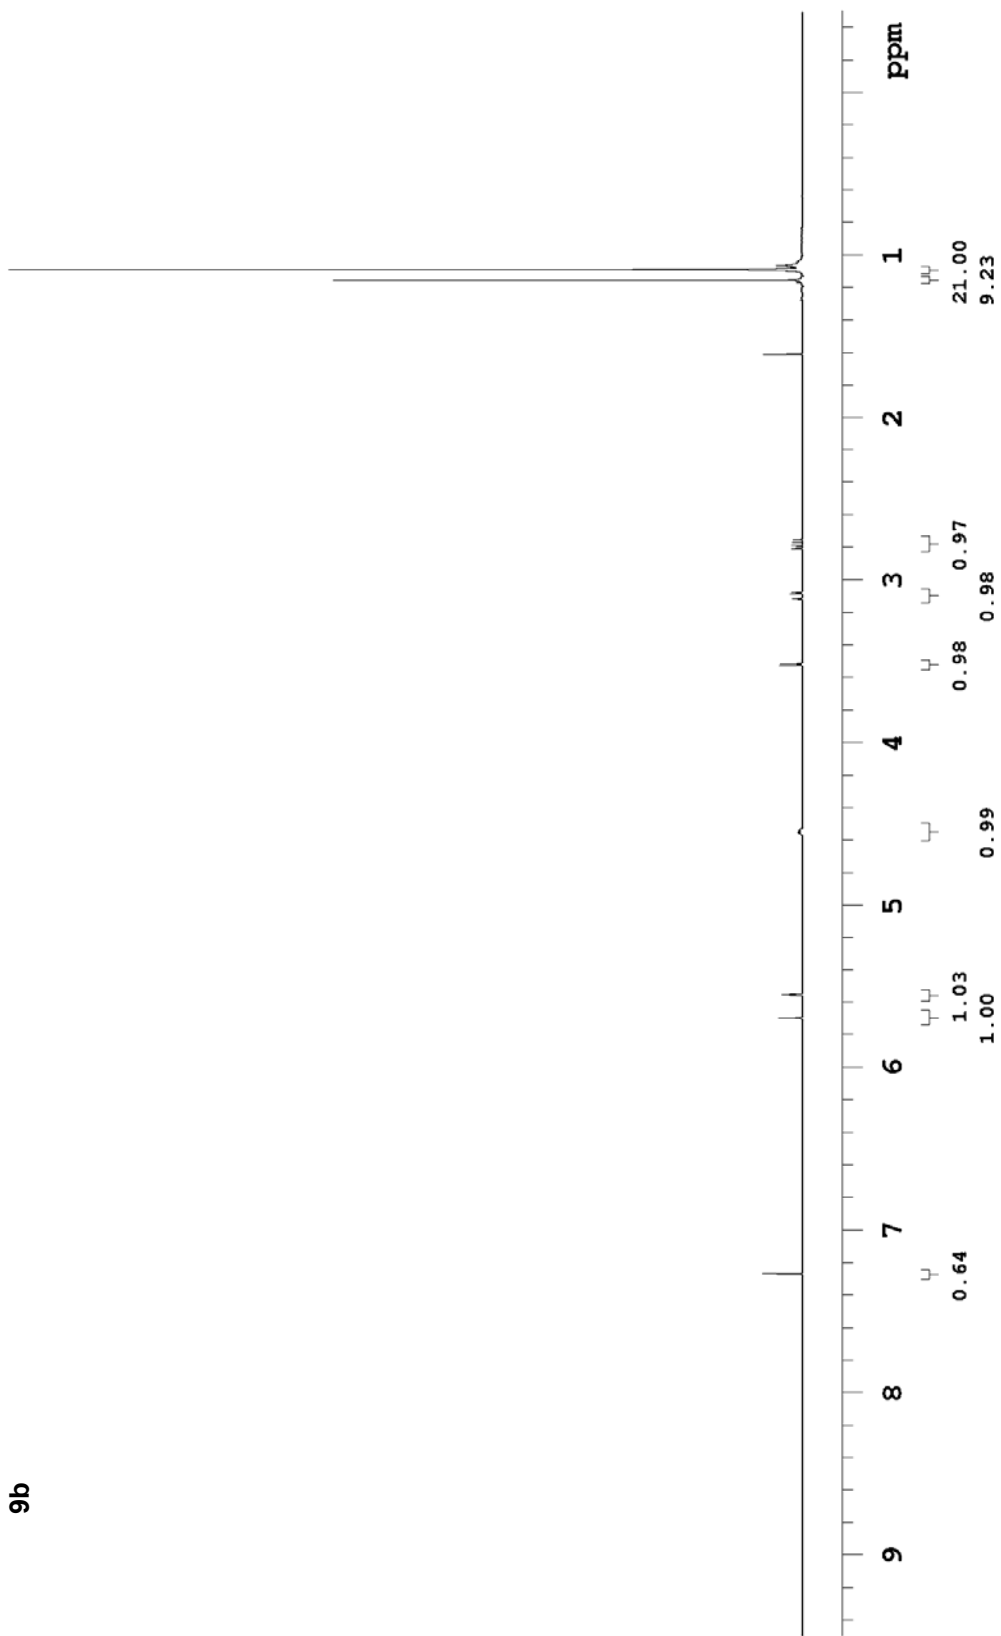

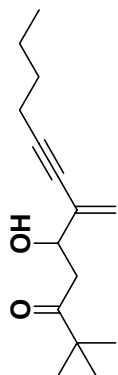

9c

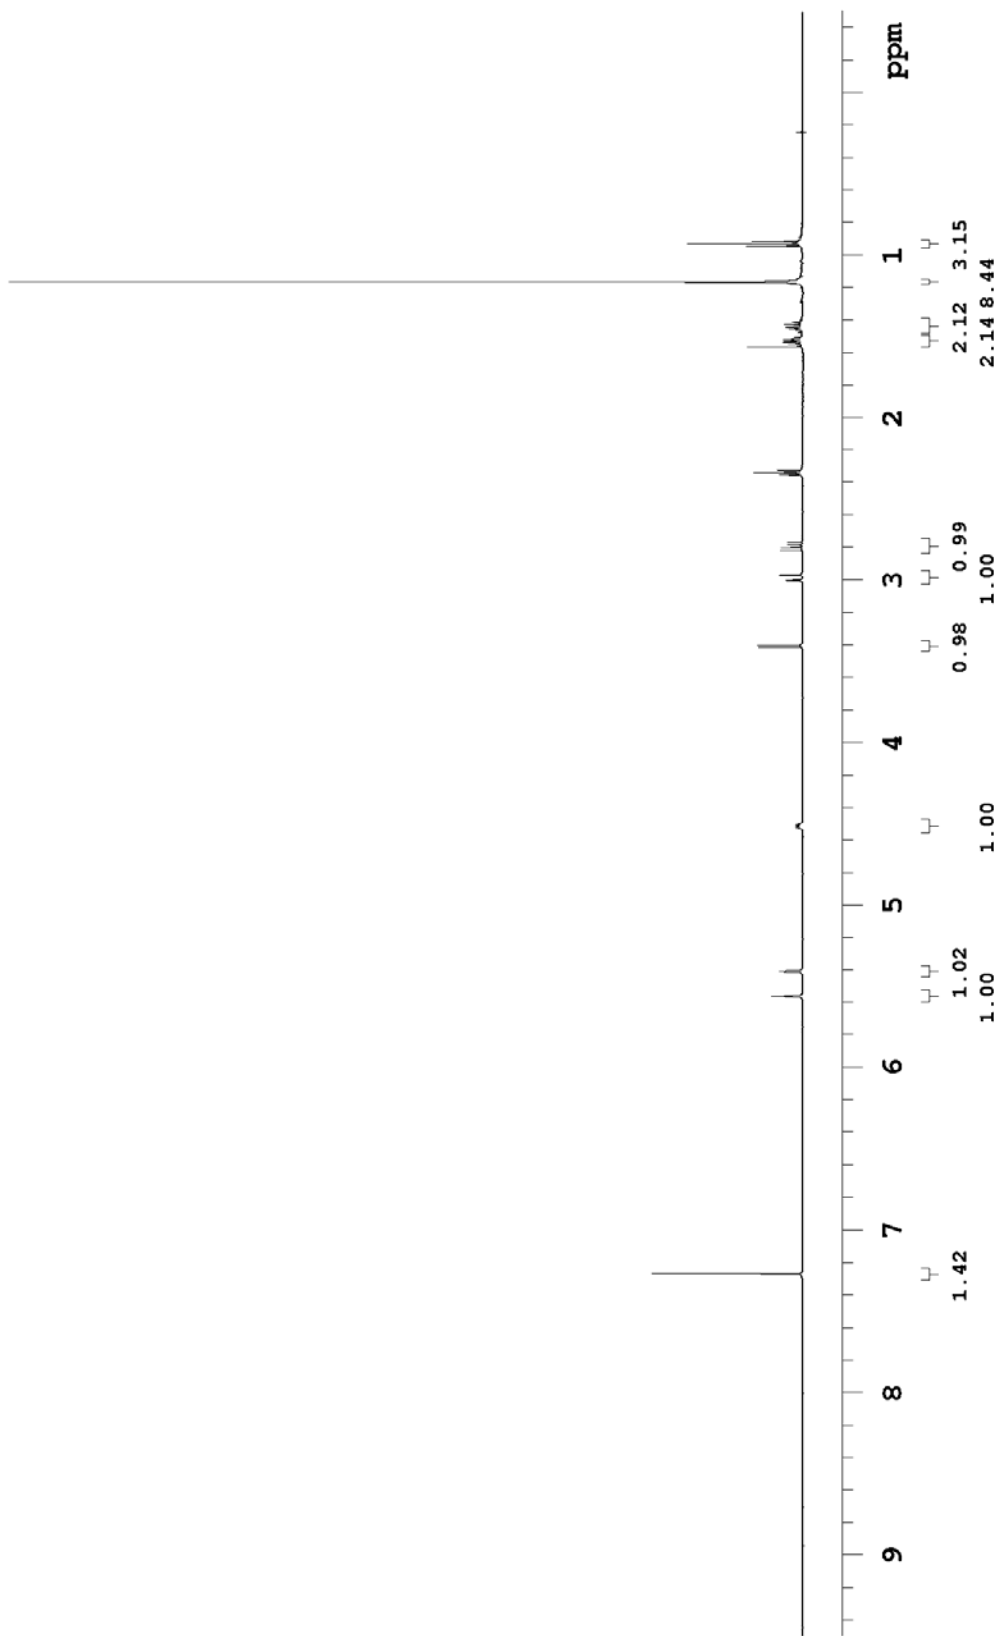



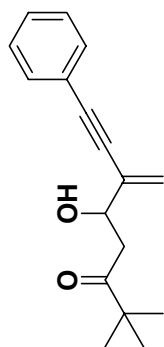

9d

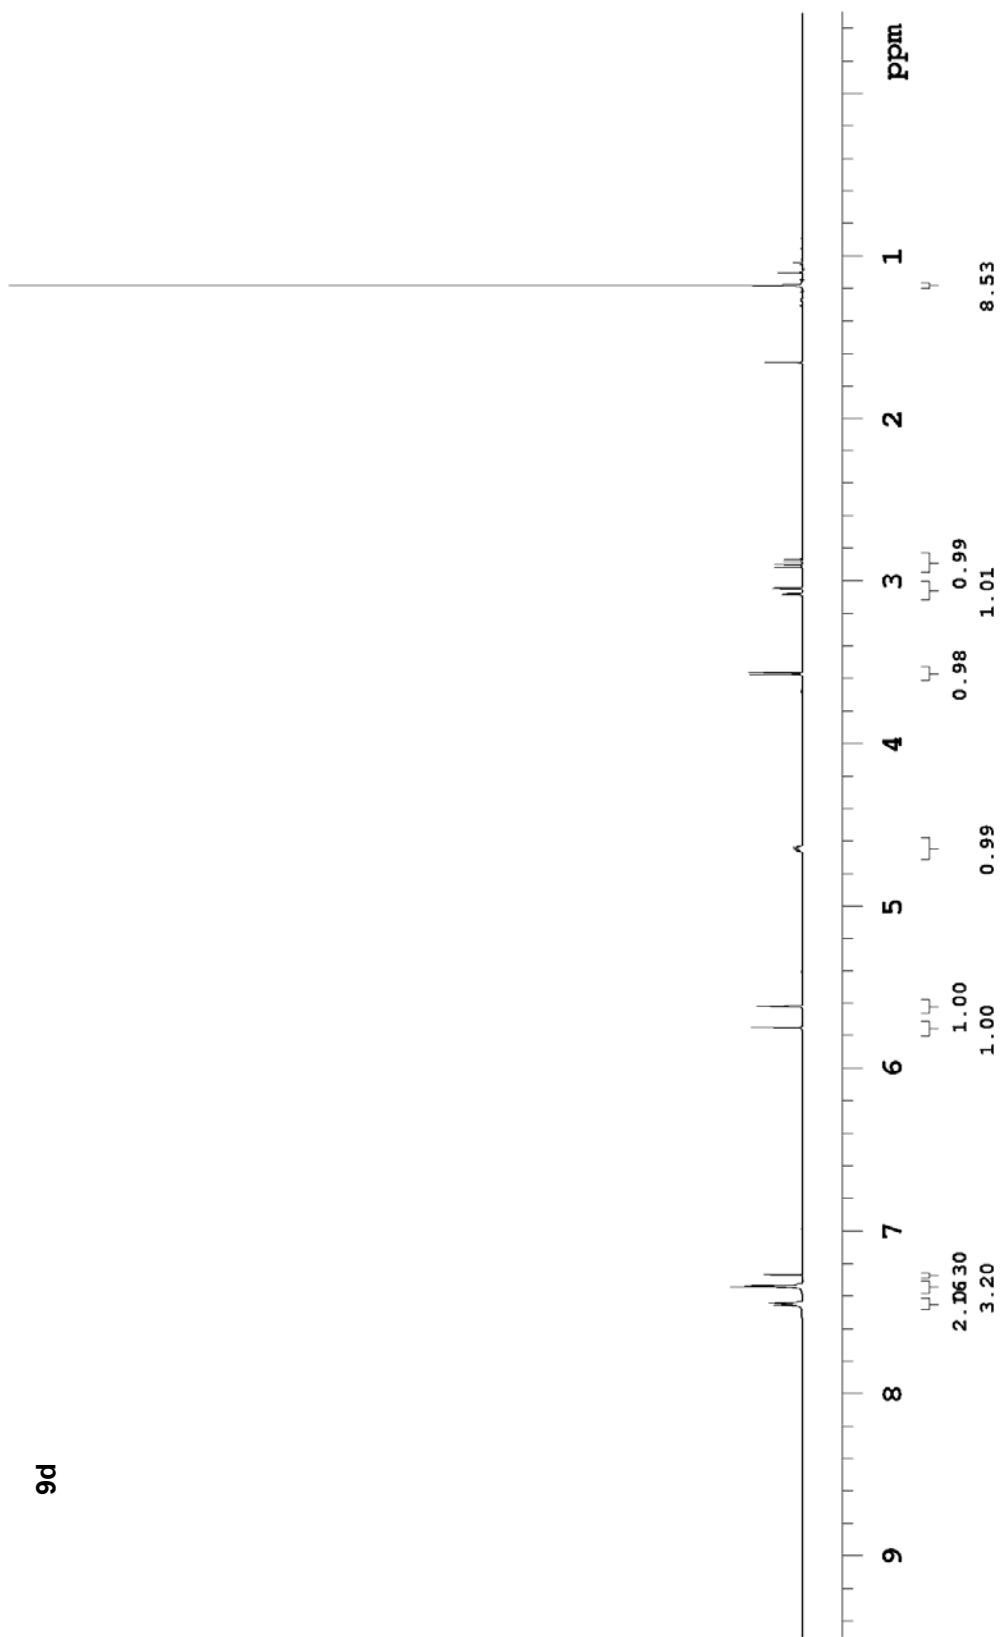

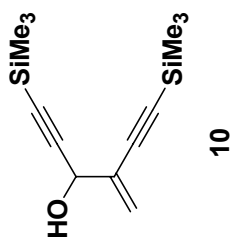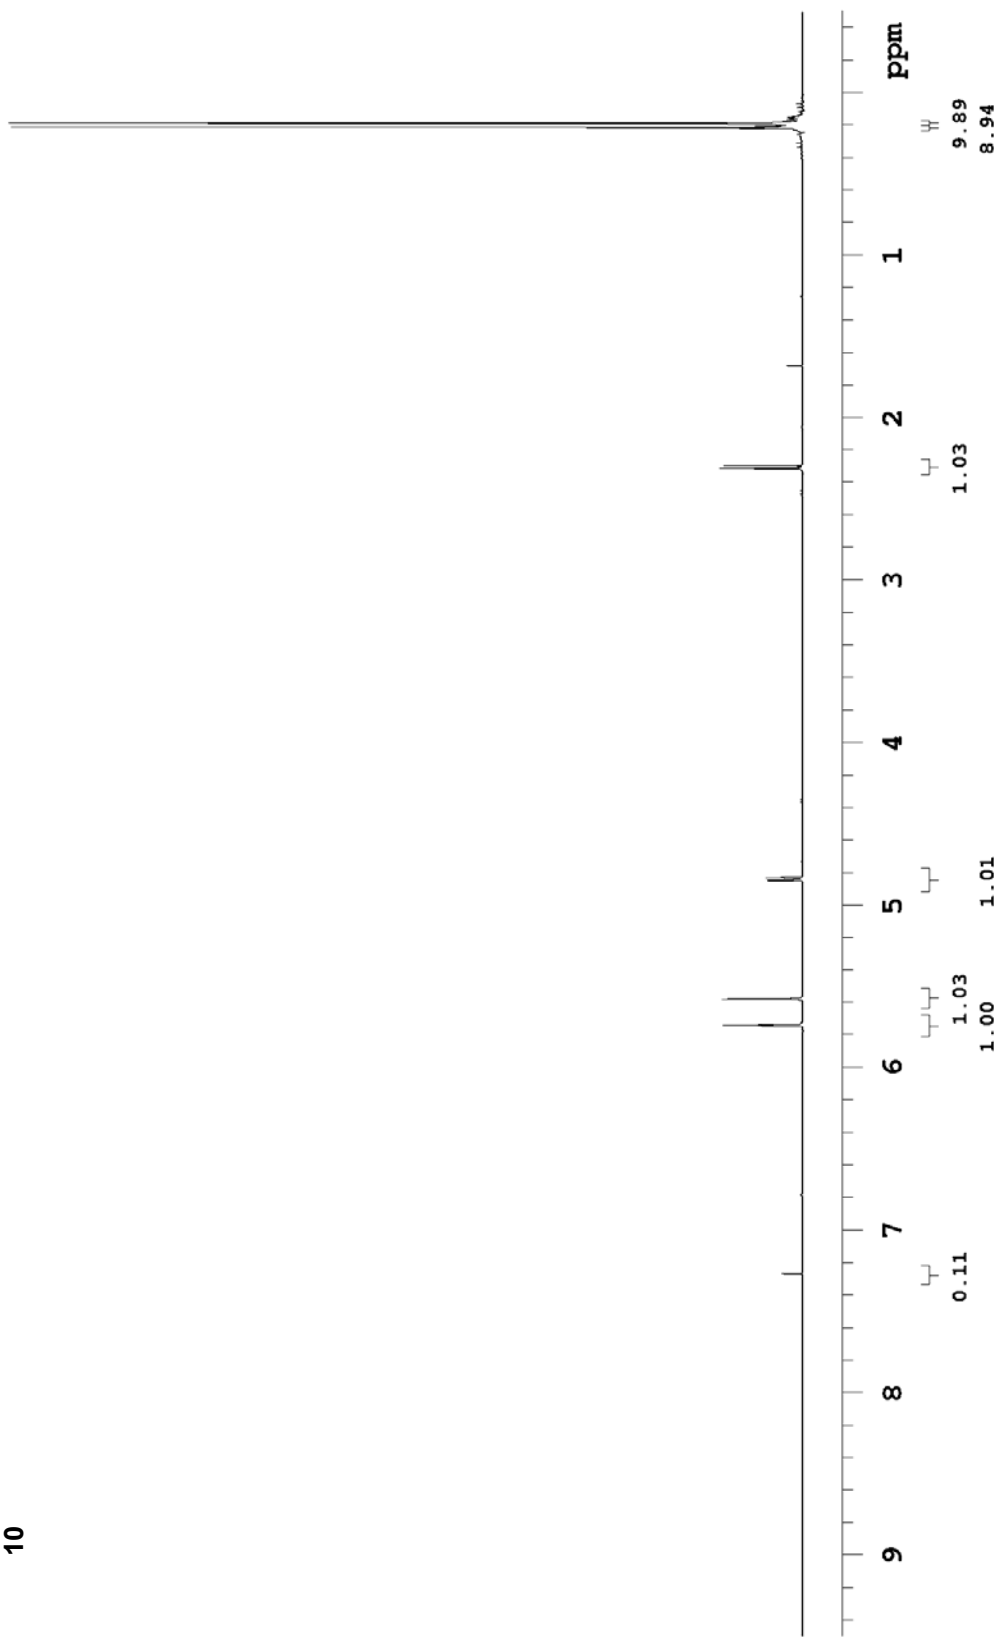

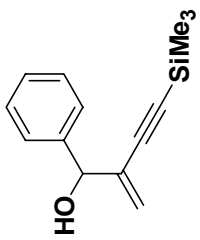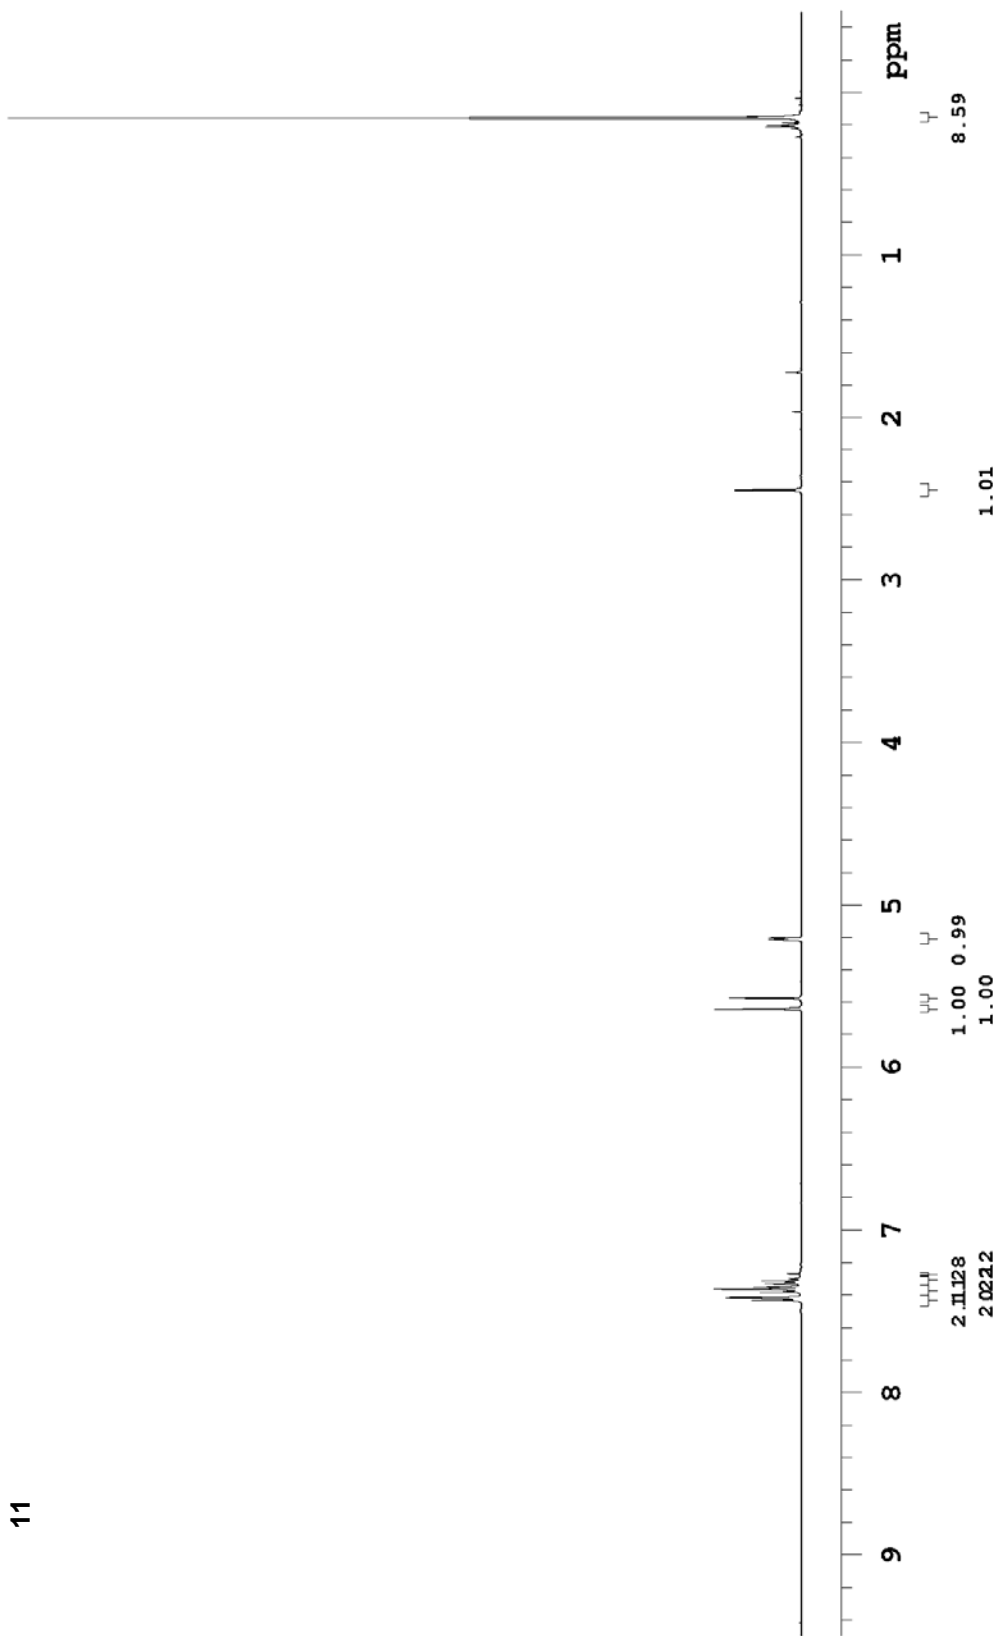

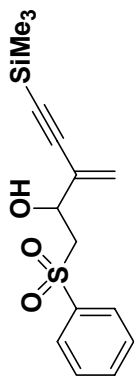

12

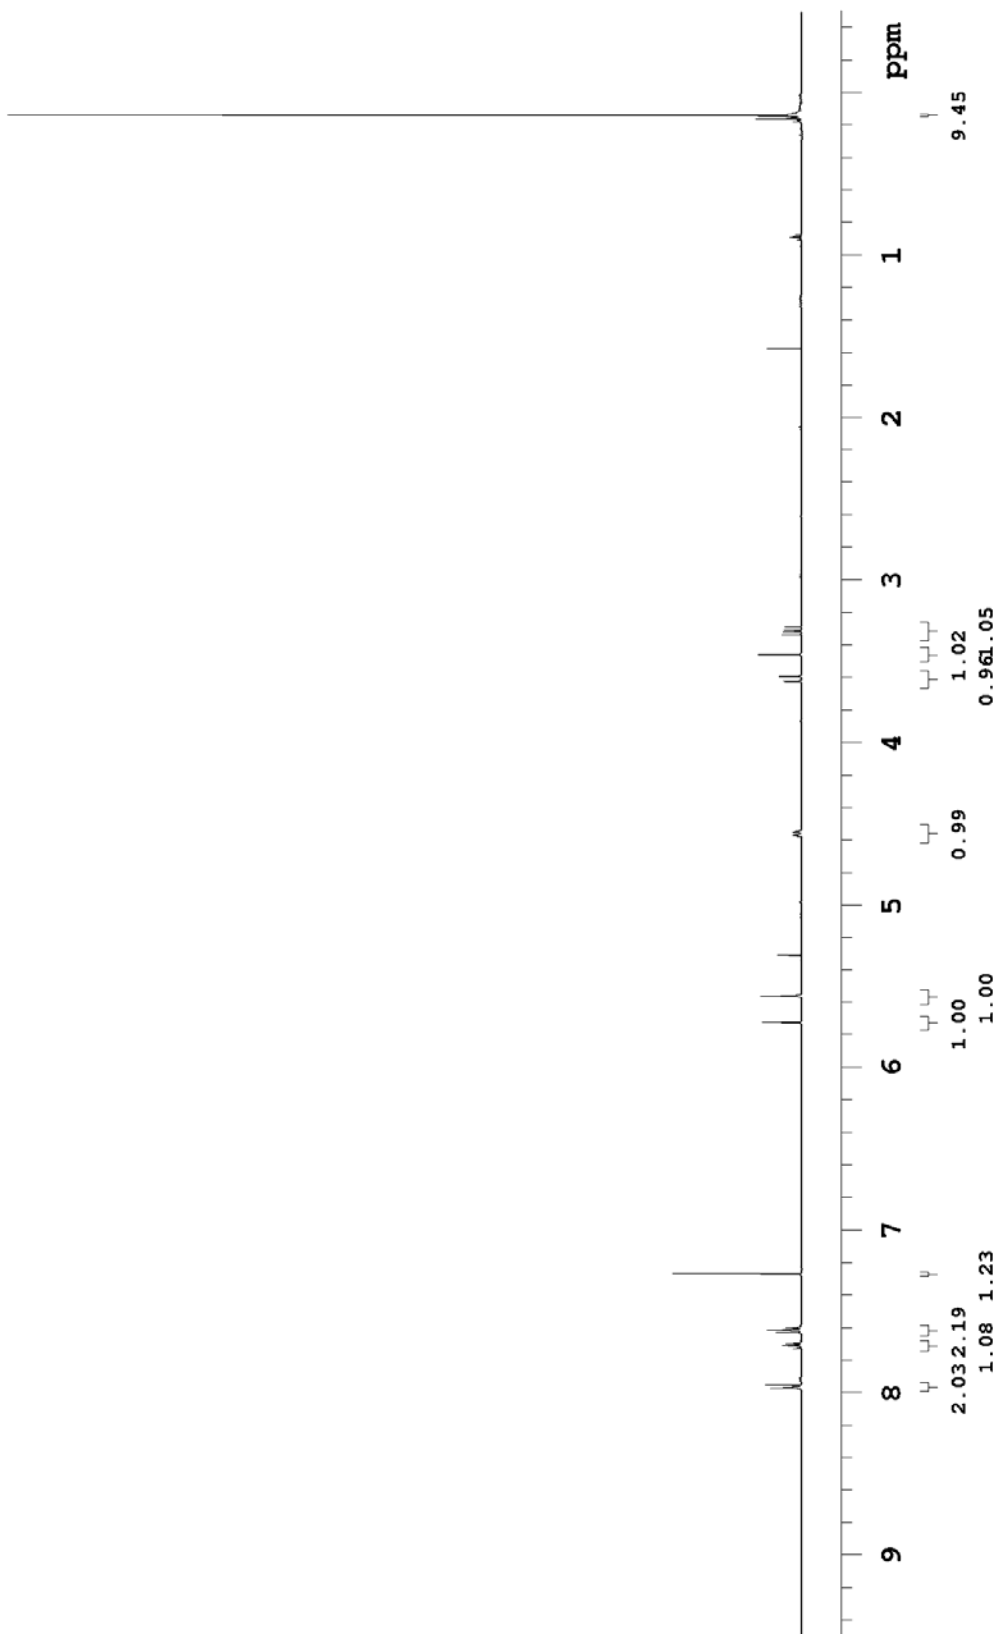

Supplement: NIHMS214836-supplement-Supporting_Information.pdf [file NIHMS214836-supplement-Supporting_Information.pdf]
